# Supplementary material for: Effect of water and methanol on the dissolution and gelatinization of corn starch in [MMIM][(MeO)HPO2]
Source: Royal Society of Chemistry journal article supplement (doi:10.1039/c5ra11170f), 2015-01-01
Supplement: c5ra11170f1.pdf [file c5ra11170f1.pdf]

## **Supporting information**

### **Effect of water and methanol on the dissolution and gelatinization of corn starch in [MMIM][(MeO)HPO<sub>2</sub>]**

Jianan Shen, Leli Wang, Yongjun Men, Ying Wu, Qiaohong Peng, Xiaoling Wang, Rui Yang,

Khalid Mahmood and Zhengping Liu\*

BNU Lab of Environmentally Friendly and Functional Polymer Materials,

Beijing Key Laboratory of Energy Conversion and Storage Materials,

College of Chemistry, Beijing Normal University, Beijing 100875, PR China

Tel.: +86 10 58806896; fax: +86 10 58802075. E-mail address: lzp@bnu.edu.cn.

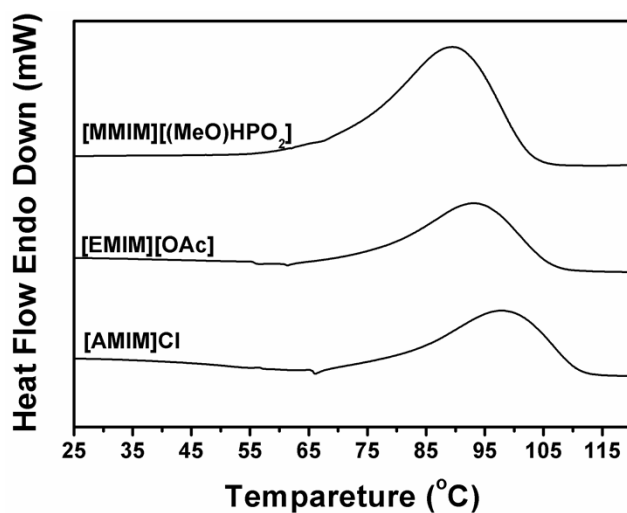

**Figure S1.** DSC curves of corn starch in different ionic liquids. Aluminum crucibles are heated from 25 °C to 120 °C at scanning rate of 5 °C/min.

**Table S1.** DSC data of 10 wt% corn starch in different ionic liquids.<sup>a</sup>

| Ionic liquids                  | T <sub>o</sub> (°C) | T <sub>p</sub> (°C) | T <sub>e</sub> (°C) | ΔH (J g <sup>-1</sup> ) |
|--------------------------------|---------------------|---------------------|---------------------|-------------------------|
| [MMIM][(MeO)HPO <sub>2</sub> ] | 70                  | 90                  | 103                 | 14.02                   |
| [EMIM][OAc]                    | 75                  | 93                  | 107                 | 12.00                   |
| [AMIM]Cl                       | 78                  | 98                  | 111                 | 9.01                    |

<sup>a</sup> T<sub>o</sub>: onset temperature; T<sub>p</sub>: peak temperature; T<sub>e</sub>: endset temperature; ΔH: transition enthalpy.

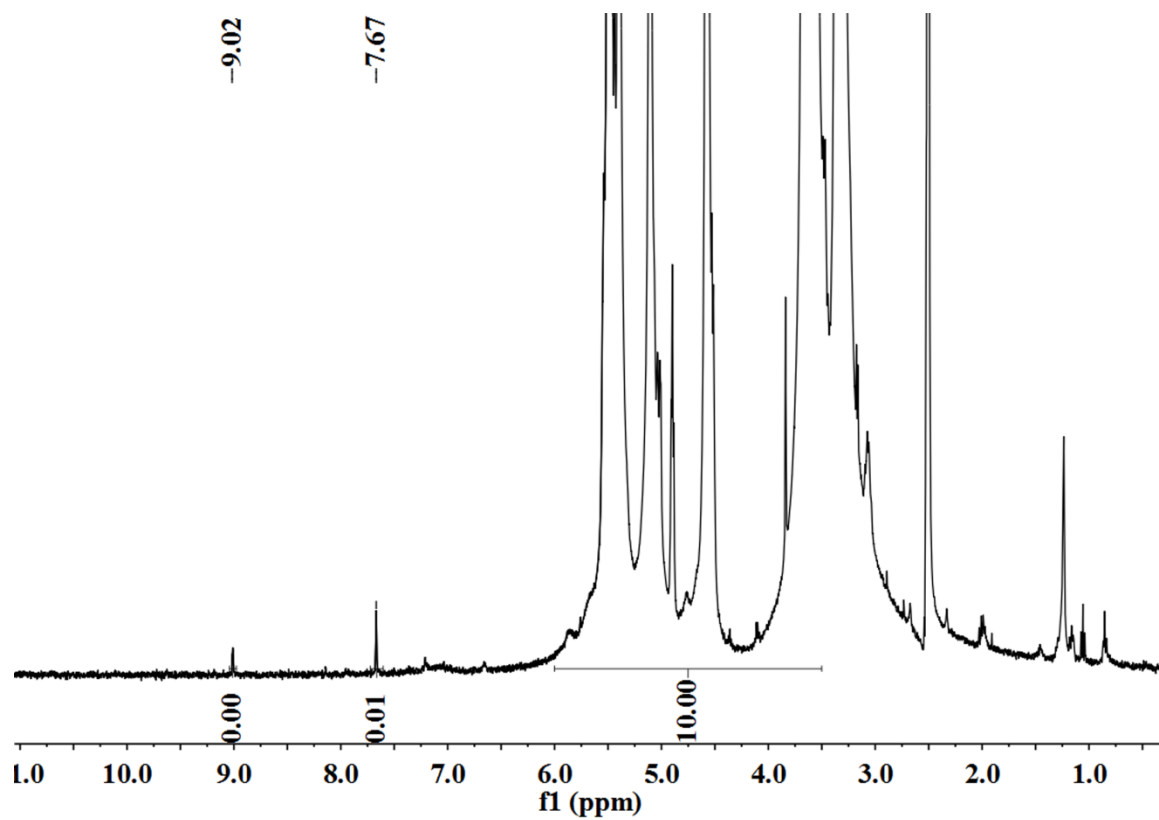

**Figure S2.**  $^1\text{H}$  NMR spectrum of regenerated starch after dissolved in  $[\text{MMIM}][(\text{MeO})\text{HPO}_2]$  at 80 °C for 50 min.
